# Supplementary material for: Circulating genotypes of Leptospira in French Polynesia : An 9-year molecular epidemiology surveillance follow-up study
Source: PLoS Negl Trop Dis. 2020 Sep 28;14(9):e0008662. doi: 10.1371/journal.pntd.0008662 (PMC7544043; doi:10.1371/journal.pntd.0008662)
Supplement: S2 Table — (XLSX) [file pntd.0008662.s004.xlsx]

## Sheet: Sheet1
ID	Year of isolation	Host	Material	Age	Sex	Place of residence	Island of residence (patients) or sampling (animals)	Outcome	Serogroup	Species	Genotype	Lineage	Source
CHPF-15-39	2015	Homo sapiens	Serum	28	Male	RURUTU	AUSTRAL	Alive	NA	L. interrogans	10	Lineage 4	This study
CHPF-11-04	2011	Homo sapiens	Serum	51	Male	BORA BORA	BORA BORA	Alive	NA	L. interrogans	9	Lineage 4	This study
CHPF-13-16	2013	Homo sapiens	Serum	43	Male	BORA BORA	BORA BORA	Dead	NA	L. interrogans	9	Lineage 4	This study
CHPF-15-43	2015	Homo sapiens	Serum	30	Male	BORA BORA	BORA BORA	Alive	NA	L. interrogans	9	Lineage 4	This study
CHPF-16-17	2016	Homo sapiens	Serum	43	Male	BORA BORA	BORA BORA	Alive	NA	L. interrogans	9	Lineage 4	This study
CHPF-18-48	2018	Homo sapiens	Serum	16	Male	BORA BORA	BORA BORA	Alive	NA	L. interrogans	9	Lineage 4	This study
CHPF-19-33	2019	Homo sapiens	Serum	70	Male	BORA BORA	BORA BORA	Alive	NA	L. interrogans	9	Lineage 4	This study
CHPF-16-30	2016	Homo sapiens	Serum	35	Male	GAMBIER	GAMBIER	Alive	NA	L. interrogans	9	Lineage 4	This study
CHPF-17-03	2017	Homo sapiens	Serum	29	Male	GAMBIER	GAMBIER	Alive	NA	L. interrogans	9	Lineage 4	This study
CHPF-12-10	2012	Homo sapiens	Serum	24	Male	HUAHINE	HUAHINE	Alive	NA	L. interrogans	9	Lineage 4	This study
CHPF-13-04	2013	Homo sapiens	Serum	22	Male	HUAHINE	HUAHINE	Alive	NA	L. interrogans	9	Lineage 4	This study
CHPF-14-16	2014	Homo sapiens	Serum	36	Male	HUAHINE	HUAHINE	Alive	NA	L. interrogans	9	Lineage 4	This study
CHPF-14-37	2014	Homo sapiens	Serum	43	Male	HUAHINE	HUAHINE	Alive	NA	L. interrogans	9	Lineage 4	This study
CHPF-15-01	2015	Homo sapiens	Serum	25	Male	HUAHINE	HUAHINE	Alive	NA	L. interrogans	9	Lineage 4	This study
CHPF-16-08	2016	Homo sapiens	Serum	44	Female	HUAHINE	HUAHINE	Alive	NA	L. interrogans	9	Lineage 4	This study
CHPF-16-14	2016	Homo sapiens	Serum	31	Female	HUAHINE	HUAHINE	Alive	NA	L. interrogans	9	Lineage 4	This study
CHPF-16-26	2016	Homo sapiens	Serum	31	Male	HUAHINE	HUAHINE	Alive	NA	L. interrogans	9	Lineage 4	This study
CHPF-16-39	2016	Homo sapiens	Serum	23	Male	HUAHINE	HUAHINE	Alive	NA	L. interrogans	9	Lineage 4	This study
CHPF-17-17	2017	Homo sapiens	Serum	51	Male	HUAHINE	HUAHINE	Dead	NA	L. interrogans	9	Lineage 4	This study
CHPF-17-22	2017	Homo sapiens	Serum	48	Female	HUAHINE	HUAHINE	Alive	NA	L. interrogans	9	Lineage 4	This study
CHPF-17-32	2017	Homo sapiens	Serum	28	Male	HUAHINE	HUAHINE	Alive	NA	L. interrogans	9	Lineage 4	This study
CHPF-18-13	2018	Homo sapiens	Serum	43	Male	HUAHINE	HUAHINE	Alive	NA	L. interrogans	9	Lineage 4	This study
CHPF-18-15	2018	Homo sapiens	Serum	40	Male	HUAHINE	HUAHINE	Alive	NA	L. interrogans	9	Lineage 4	This study
CHPF-18-17	2018	Homo sapiens	Serum	23	Female	HUAHINE	HUAHINE	Alive	NA	L. interrogans	9	Lineage 4	This study
CHPF-18-18	2018	Homo sapiens	Serum	17	Male	HUAHINE	HUAHINE	Alive	NA	L. interrogans	9	Lineage 4	This study
CHPF-18-23	2018	Homo sapiens	Serum	17	Male	HUAHINE	HUAHINE	Alive	NA	L. interrogans	10	Lineage 4	This study
CHPF-18-47	2018	Homo sapiens	Serum	33	Female	HUAHINE	HUAHINE	Alive	NA	L. interrogans	9	Lineage 4	This study
CHPF-18-57	2018	Homo sapiens	Serum	24	Male	HUAHINE	HUAHINE	Alive	NA	L. interrogans	9	Lineage 4	This study
CHPF-19-57	2019	Homo sapiens	Serum	18	Female	HUAHINE	HUAHINE	Alive	NA	L. interrogans	19	Lineage 4	This study
CHPF-19-66	2019	Homo sapiens	Serum	34	Female	HUAHINE	HUAHINE	Alive	NA	L. interrogans	9	Lineage 4	This study
KY357054	2015	Homo sapiens	Serum	NA	NA	NA	HUAHINE	NA	NA	L. interrogans	9	Lineage 4	Guernier et al., 2017
KY357059	2015	Homo sapiens	Serum	NA	NA	NA	HUAHINE	NA	NA	L. interrogans	9	Lineage 4	Guernier et al., 2017
CHPF-15-40	2015	Homo sapiens	Serum	28	Male	HIVA OA	MARQUESAS	Alive	NA	L. interrogans	10	Lineage 4	This study
CHPF-19-12	2019	Homo sapiens	Serum	60	Male	HIVA OA	MARQUESAS	Alive	NA	L. interrogans	15	Lineage 4	This study
KY357053	2015	Homo sapiens	Serum	NA	NA	NA	MOOREA	NA	NA	L. interrogans	10	Lineage 4	Guernier et al., 2017
KY357056	2015	Homo sapiens	Serum	NA	NA	NA	MOOREA	NA	NA	L. interrogans	9	Lineage 4	Guernier et al., 2017
KY357075	2014	Homo sapiens	Serum	NA	NA	NA	MOOREA	NA	NA	L. interrogans	9	Lineage 4	Guernier et al., 2017
KY357078	2015	Homo sapiens	Serum	NA	NA	NA	MOOREA	NA	NA	L. interrogans	10	Lineage 4	Guernier et al., 2017
KY357112	2015	Homo sapiens	Serum	NA	NA	NA	MOOREA	NA	NA	L. borgpetersenii	2	Lineage 1	Guernier et al., 2017
CHPF-11-09	2011	Homo sapiens	Serum	74	Female	MOOREA-MAIAO	MOOREA-MAIAO	Dead	NA	L. interrogans	9	Lineage 4	This study
CHPF-12-17	2012	Homo sapiens	Serum	58	Male	MOOREA-MAIAO	MOOREA-MAIAO	Dead	NA	L. interrogans	9	Lineage 4	This study
CHPF-12-18	2012	Homo sapiens	Serum	25	Male	MOOREA-MAIAO	MOOREA-MAIAO	Alive	NA	L. interrogans	9	Lineage 4	This study
CHPF-14-06	2014	Homo sapiens	Serum	50	Male	MOOREA-MAIAO	MOOREA-MAIAO	Dead	NA	L. interrogans	10	Lineage 4	This study
CHPF-14-07	2014	Homo sapiens	Serum	30	Male	MOOREA-MAIAO	MOOREA-MAIAO	Alive	NA	L. weilii	3	Lineage 2	This study
CHPF-14-19	2014	Homo sapiens	Serum	29	Female	MOOREA-MAIAO	MOOREA-MAIAO	Alive	NA	L. interrogans	9	Lineage 4	This study
CHPF-14-34	2014	Homo sapiens	Serum	61	Male	MOOREA-MAIAO	MOOREA-MAIAO	Alive	NA	L. interrogans	12	Lineage 4	This study
CHPF-16-32	2016	Homo sapiens	Serum	28	Male	MOOREA-MAIAO	MOOREA-MAIAO	Alive	NA	L. interrogans	10	Lineage 4	This study
CHPF-16-34	2016	Homo sapiens	Serum	62	Male	MOOREA-MAIAO	MOOREA-MAIAO	Alive	NA	L. interrogans	9	Lineage 4	This study
CHPF-16-40	2016	Homo sapiens	Serum	27	Male	MOOREA-MAIAO	MOOREA-MAIAO	Dead	NA	L. interrogans	10	Lineage 4	This study
CHPF-17-24	2017	Homo sapiens	Serum	28	Female	MOOREA-MAIAO	MOOREA-MAIAO	Alive	NA	L. interrogans	9	Lineage 4	This study
CHPF-19-08	2019	Homo sapiens	Serum	18	Male	MOOREA-MAIAO	MOOREA-MAIAO	Alive	NA	L. interrogans	10	Lineage 4	This study
CHPF-19-14	2019	Homo sapiens	Serum	12	Male	MOOREA-MAIAO	MOOREA-MAIAO	Alive	NA	L. interrogans	16	Lineage 4	This study
CHPF-19-65	2019	Homo sapiens	Serum	51	Male	MOOREA-MAIAO	MOOREA-MAIAO	Alive	NA	L. interrogans	9	Lineage 4	This study
CHPF-19-56 *	2019	Homo sapiens	Serum	56	Male	PAPARA	TAHITI	Alive	NA	L. interrogans	9	Lineage 4	This study
CHPF-19-75 **	2019	Homo sapiens	Serum	21	Male	PAPEETE	TAHITI	Alive	NA	L. weilii	3	Lineage 2	This study
200701184	2007	Homo sapiens	Serum	18	Male	NA	NA	NA	Mini	L. weilii	3	Lineage 2	This study
200701306	2007	Homo sapiens	Serum	28	Female	NA	NA	NA	Mini	L. weilii	3	Lineage 2	This study
200800104	2007	Homo sapiens	Serum	34	Male	NA	NA	NA	Ballum	L. borgpetersenii	2	Lineage 1	This study
200800517	2008	Homo sapiens	Serum	27	Male	NA	NA	NA	Canicola	L. interrogans	8	Lineage 3	This study
200800857	2007	Homo sapiens	Serum	54	Male	NA	NA	NA	Icterohaemorrhagiae	L. interrogans	9	Lineage 4	This study
200801323	2008	Homo sapiens	Serum	46	Male	NA	NA	NA	Australis	L. interrogans	10	Lineage 4	This study
200802063	2008	Homo sapiens	Serum	52	Male	NA	NA	NA	Ballum	L. borgpetersenii	2	Lineage 1	This study
200900101	2008	Homo sapiens	Serum	25	Male	NA	NA	NA	Icterohaemorrhagiae	L. interrogans	9	Lineage 4	This study
200900207	2008	Homo sapiens	Serum	27	Male	NA	NA	NA	Icterohaemorrhagiae	L. interrogans	9	Lineage 4	This study
200900818	2009	Homo sapiens	Serum	31	Male	NA	NA	NA	Australis	L. interrogans	10	Lineage 4	This study
200901606	2009	Homo sapiens	Serum	13	Male	NA	NA	NA	Icterohaemorrhagiae	L. interrogans	9	Lineage 4	This study
200903515	2009	Homo sapiens	Serum	55	Female	NA	NA	NA	Icterohaemorrhagiae	L. interrogans	9	Lineage 4	This study
201001007	2010	Homo sapiens	Serum	15	Male	NA	NA	NA	Mini	L. weilii	3	Lineage 2	This study
201001294	2010	Homo sapiens	Serum	37	Male	NA	NA	NA	Mini	L. weilii	3	Lineage 2	This study
201001295	2010	Homo sapiens	Serum	44	Male	NA	NA	NA	Icterohaemorrhagiae	L. interrogans	9	Lineage 4	This study
201002400	2010	Homo sapiens	Serum	43	Male	NA	NA	NA	Icterohaemorrhagiae	L. interrogans	9	Lineage 4	This study
201100860	2011	Homo sapiens	Serum	15	Male	NA	NA	NA	Australis	L. interrogans	10	Lineage 4	This study
200210107 ***	2002	Homo sapiens	Serum	NA	NA	NA	NA	NA	Pomona	L. interrogans	8	Lineage 3	This study
200212385 ***	2002	Homo sapiens	Serum	NA	NA	NA	NA	NA	Canicola	L. interrogans	8	Lineage 3	This study
200403463 ***	2004	Homo sapiens	Serum	NA	NA	NA	NA	NA	Pomona	L. interrogans	8	Lineage 3	This study
KY357061	2014	Homo sapiens	Serum	NA	NA	NA	NA	NA	NA	L. interrogans	9	Lineage 4	Guernier et al., 2017
KY357077	2014	Homo sapiens	Serum	NA	NA	NA	NA	NA	NA	L. interrogans	9	Lineage 4	Guernier et al., 2017
CHPF-11-15	2011	Homo sapiens	Serum	35	Male	UTUROA	RAIATEA	Alive	NA	L. interrogans	9	Lineage 4	This study
CHPF-11-18	2011	Homo sapiens	Serum	31	Male	UTUROA	RAIATEA	Alive	NA	L. interrogans	10	Lineage 4	This study
CHPF-14-04	2014	Homo sapiens	Serum	23	Male	UTUROA	RAIATEA	Alive	NA	L. interrogans	9	Lineage 4	This study
CHPF-14-15	2014	Homo sapiens	Serum	24	Male	UTUROA	RAIATEA	Alive	NA	L. interrogans	9	Lineage 4	This study
CHPF-14-45	2014	Homo sapiens	Serum	56	Male	TUMARAA	RAIATEA	Alive	NA	L. interrogans	9	Lineage 4	This study
CHPF-15-07	2015	Homo sapiens	Serum	44	Male	TUMARAA	RAIATEA	Alive	NA	L. interrogans	9	Lineage 4	This study
CHPF-15-19	2015	Homo sapiens	Serum	39	Female	TUMARAA	RAIATEA	Alive	NA	L. interrogans	9	Lineage 4	This study
CHPF-15-26	2015	Homo sapiens	Serum	16	Male	UTUROA	RAIATEA	Alive	NA	L. interrogans	9	Lineage 4	This study
CHPF-15-44	2015	Homo sapiens	Serum	16	Male	UTUROA	RAIATEA	Alive	NA	L. interrogans	9	Lineage 4	This study
CHPF-16-04	2016	Homo sapiens	Serum	23	Male	TUMARAA	RAIATEA	Alive	NA	L. interrogans	9	Lineage 4	This study
CHPF-16-27	2016	Homo sapiens	Serum	16	Male	UTUROA	RAIATEA	Alive	NA	L. interrogans	10	Lineage 4	This study
CHPF-18-38	2018	Homo sapiens	Serum	52	Male	UTUROA	RAIATEA	Alive	NA	L. interrogans	9	Lineage 4	This study
CHPF-18-64	2018	Homo sapiens	Serum	67	Male	TAPUTAPUATEA	RAIATEA	Alive	NA	L. interrogans	9	Lineage 4	This study
CHPF-18-71	2018	Homo sapiens	Serum	28	Male	UTUROA	RAIATEA	Alive	NA	L. interrogans	9	Lineage 4	This study
CHPF-18-79	2018	Homo sapiens	Serum	29	Male	UTUROA	RAIATEA	Alive	NA	L. interrogans	9	Lineage 4	This study
CHPF-19-60	2019	Homo sapiens	Serum	62	Male	TUMARAA	RAIATEA	Alive	NA	L. interrogans	20	Lineage 4	This study
CHPF-19-67	2019	Homo sapiens	Serum	32	Female	TAPUTAPUATEA	RAIATEA	Alive	NA	L. interrogans	9	Lineage 4	This study
KY357062	2014	Homo sapiens	Serum	NA	NA	NA	RAIATEA	NA	NA	L. interrogans	9	Lineage 4	Guernier et al., 2017
KY357067	2014	Homo sapiens	Serum	NA	NA	NA	RAIATEA	NA	NA	L. interrogans	9	Lineage 4	Guernier et al., 2017
KY357079	2014	Homo sapiens	Serum	NA	NA	NA	RAIATEA	NA	NA	L. interrogans	9	Lineage 4	Guernier et al., 2017
KY357110	2012	Homo sapiens	Serum	NA	NA	NA	RAIATEA	NA	NA	L. interrogans	9	Lineage 4	Guernier et al., 2017
KY357111	2014	Homo sapiens	Serum	NA	NA	NA	RAIATEA	NA	NA	L. interrogans	9	Lineage 4	Guernier et al., 2017
KY357115	2014	Homo sapiens	Serum	NA	NA	NA	RAIATEA	NA	NA	L. interrogans	9	Lineage 4	Guernier et al., 2017
KY357116	2014	Homo sapiens	Serum	NA	NA	NA	RAIATEA	NA	NA	L. interrogans	9	Lineage 4	Guernier et al., 2017
CHPF-15-09	2015	Homo sapiens	Serum	19	Male	TAHAA	TAHAA	Alive	NA	L. interrogans	9	Lineage 4	This study
CHPF-16-25	2016	Homo sapiens	Serum	41	Male	TAHAA	TAHAA	Alive	NA	L. interrogans	9	Lineage 4	This study
CHPF-18-20	2018	Homo sapiens	Serum	51	Female	TAHAA	TAHAA	Alive	NA	L. interrogans	18	Lineage 4	This study
CHPF-18-65	2018	Homo sapiens	Serum	55	Male	TAHAA	TAHAA	Alive	NA	L. interrogans	9	Lineage 4	This study
KY357065	2015	Homo sapiens	Serum	NA	NA	NA	TAHAA	NA	NA	L. interrogans	9	Lineage 4	Guernier et al., 2017
KY357068	2014	Homo sapiens	Serum	NA	NA	NA	TAHAA	NA	NA	L. interrogans	9	Lineage 4	Guernier et al., 2017
KY357069	2014	Homo sapiens	Serum	NA	NA	NA	TAHAA	NA	NA	L. interrogans	9	Lineage 4	Guernier et al., 2017
KY357073	2015	Homo sapiens	Serum	NA	NA	NA	TAHAA	NA	NA	L. interrogans	9	Lineage 4	Guernier et al., 2017
KY357076	2014	Homo sapiens	Serum	NA	NA	NA	TAHAA	NA	NA	L. interrogans	9	Lineage 4	Guernier et al., 2017
KY357080	2014	Homo sapiens	Serum	NA	NA	NA	TAHAA	NA	NA	L. interrogans	9	Lineage 4	Guernier et al., 2017
KY357113	2015	Homo sapiens	Serum	NA	NA	NA	TAHAA	NA	NA	L. interrogans	6	Lineage 3	Guernier et al., 2017
CHPF-11-01	2011	Homo sapiens	Serum	19	Male	PAPEETE	TAHITI	Alive	NA	L. interrogans	10	Lineage 4	This study
CHPF-11-02	2011	Homo sapiens	Serum	27	Male	PUNAAUIA	TAHITI	Alive	NA	L. interrogans	9	Lineage 4	This study
CHPF-11-03	2011	Homo sapiens	Serum	47	Male	PAPEETE	TAHITI	Alive	NA	L. interrogans	9	Lineage 4	This study
CHPF-11-05	2011	Homo sapiens	Serum	24	Male	HITIAA O TE RA	TAHITI	Alive	NA	L. weilii	3	Lineage 2	This study
CHPF-11-06	2011	Homo sapiens	Serum	58	Male	PAPEETE	TAHITI	Alive	NA	L. interrogans	9	Lineage 4	This study
CHPF-11-07	2011	Homo sapiens	Serum	29	Male	TAIARAPU-EST	TAHITI	Alive	NA	L. interrogans	10	Lineage 4	This study
CHPF-11-12	2011	Homo sapiens	Serum	22	Male	PAPEETE	TAHITI	Alive	NA	L. interrogans	9	Lineage 4	This study
CHPF-11-16	2011	Homo sapiens	Serum	42	Male	PUNAAUIA	TAHITI	Alive	NA	L. interrogans	9	Lineage 4	This study
CHPF-11-24	2011	Homo sapiens	Serum	31	Female	PAPARA	TAHITI	Alive	NA	L. interrogans	9	Lineage 4	This study
CHPF-11-26	2011	Homo sapiens	Serum	21	Male	TIAREI	TAHITI	Alive	NA	L. interrogans	9	Lineage 4	This study
CHPF-11-28	2011	Homo sapiens	Serum	36	Male	PAPEETE	TAHITI	Alive	NA	L. interrogans	9	Lineage 4	This study
CHPF-12-02	2012	Homo sapiens	Serum	48	Male	PAEA	TAHITI	Alive	NA	L. interrogans	10	Lineage 4	This study
CHPF-12-03	2012	Homo sapiens	Serum	19	Female	PAEA	TAHITI	Alive	NA	L. interrogans	9	Lineage 4	This study
CHPF-12-07	2012	Homo sapiens	Serum	65	Male	FAAA	TAHITI	Dead	NA	L. interrogans	9	Lineage 4	This study
CHPF-12-11	2012	Homo sapiens	Serum	20	Male	FAAA	TAHITI	Alive	NA	L. interrogans	10	Lineage 4	This study
CHPF-12-14	2012	Homo sapiens	Serum	18	Male	PIRAE	TAHITI	Alive	NA	L. interrogans	10	Lineage 4	This study
CHPF-12-16	2012	Homo sapiens	Serum	21	Female	ARUE	TAHITI	Alive	NA	L. interrogans	9	Lineage 4	This study
CHPF-12-19	2012	Homo sapiens	Serum	24	Male	FAAA	TAHITI	Alive	NA	L. interrogans	9	Lineage 4	This study
CHPF-13-01	2013	Homo sapiens	Serum	31	Female	PAEA	TAHITI	Alive	NA	L. interrogans	10	Lineage 4	This study
CHPF-13-02	2013	Homo sapiens	Serum	29	Female	FAAA	TAHITI	Alive	NA	L. interrogans	10	Lineage 4	This study
CHPF-13-05	2013	Homo sapiens	Serum	38	Male	PAPEETE	TAHITI	Alive	NA	L. interrogans	9	Lineage 4	This study
CHPF-13-06	2013	Homo sapiens	Serum	55	Male	PUNAAUIA	TAHITI	Alive	NA	L. interrogans	9	Lineage 4	This study
CHPF-13-07	2013	Homo sapiens	Serum	33	Male	PAPEETE	TAHITI	Alive	NA	L. interrogans	9	Lineage 4	This study
CHPF-13-10	2013	Homo sapiens	Serum	19	Male	FAAA	TAHITI	Alive	NA	L. interrogans	7	Lineage 3	This study
CHPF-13-22	2013	Homo sapiens	Serum	25	Male	PAPEETE	TAHITI	Alive	NA	L. interrogans	9	Lineage 4	This study
CHPF-14-05	2014	Homo sapiens	Serum	58	Male	TAIARAPU-EST	TAHITI	Dead	NA	L. interrogans	10	Lineage 4	This study
CHPF-14-10	2014	Homo sapiens	Serum	23	Male	FAAA	TAHITI	Alive	NA	L. interrogans	10	Lineage 4	This study
CHPF-14-11	2014	Homo sapiens	Serum	57	Male	PAPARA	TAHITI	Dead	NA	L. interrogans	9	Lineage 4	This study
CHPF-14-13	2014	Homo sapiens	Serum	29	Male	FAAA	TAHITI	Alive	NA	L. interrogans	9	Lineage 4	This study
CHPF-14-14	2014	Homo sapiens	Serum	41	Female	PIRAE	TAHITI	Alive	NA	L. interrogans	10	Lineage 4	This study
CHPF-14-31	2014	Homo sapiens	Serum	65	Male	FAAA	TAHITI	Alive	NA	L. borgpetersenii	2	Lineage 1	This study
CHPF-14-35	2014	Homo sapiens	Serum	51	Male	PAEA	TAHITI	Alive	NA	L. interrogans	9	Lineage 4	This study
CHPF-14-36	2014	Homo sapiens	Serum	66	Male	TAIARAPU-EST	TAHITI	Alive	NA	L. interrogans	10	Lineage 4	This study
CHPF-14-42	2014	Homo sapiens	Serum	36	Male	TAIARAPU-OUEST	TAHITI	Alive	NA	L. interrogans	9	Lineage 4	This study
CHPF-14-43	2014	Homo sapiens	Serum	38	Male	PIRAE	TAHITI	Alive	NA	L. interrogans	9	Lineage 4	This study
CHPF-14-44	2014	Homo sapiens	Serum	69	Male	PAPEETE	TAHITI	Dead	NA	L. interrogans	9	Lineage 4	This study
CHPF-15-05	2015	Homo sapiens	Serum	28	Male	PAPEETE	TAHITI	Alive	NA	L. interrogans	9	Lineage 4	This study
CHPF-15-06	2015	Homo sapiens	Serum	13	Male	TEVA I UTA	TAHITI	Alive	NA	L. interrogans	10	Lineage 4	This study
CHPF-15-08	2015	Homo sapiens	Serum	50	Male	PIRAE	TAHITI	Alive	NA	L. interrogans	9	Lineage 4	This study
CHPF-15-17	2015	Homo sapiens	Serum	15	Female	FAAA	TAHITI	Alive	NA	L. interrogans	9	Lineage 4	This study
CHPF-15-18	2015	Homo sapiens	Serum	57	Male	FAAA	TAHITI	Dead	NA	L. interrogans	9	Lineage 4	This study
CHPF-15-20	2015	Homo sapiens	Serum	19	Female	PUNAAUIA	TAHITI	Alive	NA	L. interrogans	10	Lineage 4	This study
CHPF-15-21	2015	Homo sapiens	Serum	28	Male	HITIAA O TE RA	TAHITI	Alive	NA	L. interrogans	10	Lineage 4	This study
CHPF-15-22	2015	Homo sapiens	Serum	23	Male	PAPEETE	TAHITI	Alive	NA	L. interrogans	10	Lineage 4	This study
CHPF-15-23	2015	Homo sapiens	Serum	65	Male	FAAA	TAHITI	Alive	NA	L. interrogans	10	Lineage 4	This study
CHPF-15-24	2015	Homo sapiens	Serum	30	Female	PIRAE	TAHITI	Alive	NA	L. interrogans	10	Lineage 4	This study
CHPF-15-25	2015	Homo sapiens	Serum	26	Male	MAHINA	TAHITI	Alive	NA	L. interrogans	9	Lineage 4	This study
CHPF-15-27	2015	Homo sapiens	Serum	45	Male	TAIARAPU-OUEST	TAHITI	Alive	NA	L. borgpetersenii	2	Lineage 1	This study
CHPF-15-28	2015	Homo sapiens	Serum	42	Male	ARUE	TAHITI	Alive	NA	L. interrogans	7	Lineage 3	This study
CHPF-15-29	2015	Homo sapiens	Serum	24	Male	TEVA I UTA	TAHITI	Alive	NA	L. interrogans	9	Lineage 4	This study
CHPF-15-31	2015	Homo sapiens	Serum	27	Male	PAPEETE	TAHITI	Alive	NA	L. interrogans	9	Lineage 4	This study
CHPF-15-34	2015	Homo sapiens	Serum	60	Male	PAPENOO	TAHITI	Alive	NA	L. interrogans	9	Lineage 4	This study
CHPF-15-36	2015	Homo sapiens	Serum	41	Male	PAPEETE	TAHITI	Alive	NA	L. interrogans	9	Lineage 4	This study
CHPF-15-37	2015	Homo sapiens	Serum	34	Female	PAEA	TAHITI	Alive	NA	L. interrogans	7	Lineage 3	This study
CHPF-15-38	2015	Homo sapiens	Serum	50	Male	TEVA I UTA	TAHITI	Alive	NA	L. interrogans	9	Lineage 4	This study
CHPF-15-42	2015	Homo sapiens	Serum	62	Female	PAPEETE	TAHITI	Alive	NA	L. borgpetersenii	2	Lineage 1	This study
CHPF-15-47	2015	Homo sapiens	Serum	38	Male	FAAA	TAHITI	Alive	NA	L. interrogans	13	Lineage 4	This study
CHPF-16-01	2016	Homo sapiens	Serum	14	Male	PUNAAUIA	TAHITI	Alive	NA	L. interrogans	7	Lineage 3	This study
CHPF-16-02	2016	Homo sapiens	Serum	13	Male	PAPEETE	TAHITI	Alive	NA	L. interrogans	9	Lineage 4	This study
CHPF-16-03	2016	Homo sapiens	Serum	23	Male	PAPARA	TAHITI	Alive	NA	L. interrogans	10	Lineage 4	This study
CHPF-16-07	2016	Homo sapiens	Serum	20	Female	PAPARA	TAHITI	Alive	NA	L. interrogans	10	Lineage 4	This study
CHPF-16-09	2016	Homo sapiens	Serum	88	Female	TAIARAPU-EST	TAHITI	Alive	NA	L. interrogans	10	Lineage 4	This study
CHPF-16-10	2016	Homo sapiens	Serum	53	Female	PAEA	TAHITI	Alive	NA	L. interrogans	9	Lineage 4	This study
CHPF-16-12	2016	Homo sapiens	Serum	30	Male	PAPEETE	TAHITI	Alive	NA	L. weilii	3	Lineage 2	This study
CHPF-16-15	2016	Homo sapiens	Serum	24	Male	PAPARA	TAHITI	Alive	NA	L. interrogans	9	Lineage 4	This study
CHPF-16-16	2016	Homo sapiens	Serum	40	Female	PAPEARI	TAHITI	Alive	NA	L. interrogans	9	Lineage 4	This study
CHPF-16-20	2016	Homo sapiens	Serum	20	Male	TAIARAPU-EST	TAHITI	Alive	NA	L. weilii	3	Lineage 2	This study
CHPF-16-21	2016	Homo sapiens	Serum	22	Male	TAIARAPU-EST	TAHITI	Alive	NA	L. interrogans	9	Lineage 4	This study
CHPF-16-22	2016	Homo sapiens	Serum	49	Female	MATAIEA	TAHITI	Alive	NA	L. interrogans	10	Lineage 4	This study
CHPF-16-23	2016	Homo sapiens	Serum	19	Male	PAPEETE	TAHITI	Alive	NA	L. interrogans	9	Lineage 4	This study
CHPF-16-24	2016	Homo sapiens	Serum	39	Male	HITIAA O TE RA	TAHITI	Alive	NA	L. interrogans	10	Lineage 4	This study
CHPF-16-28	2016	Homo sapiens	Serum	52	Male	FAAA	TAHITI	Alive	NA	L. interrogans	10	Lineage 4	This study
CHPF-16-29	2016	Homo sapiens	Serum	21	Male	TAIARAPU-EST	TAHITI	Alive	NA	L. interrogans	9	Lineage 4	This study
CHPF-16-31	2016	Homo sapiens	Serum	38	Male	TAIARAPU-EST	TAHITI	Alive	NA	L. interrogans	9	Lineage 4	This study
CHPF-16-33	2016	Homo sapiens	Serum	44	Female	PUNAAUIA	TAHITI	Alive	NA	L. interrogans	9	Lineage 4	This study
CHPF-16-35	2016	Homo sapiens	Serum	30	Male	PUNAAUIA	TAHITI	Alive	NA	L. interrogans	9	Lineage 4	This study
CHPF-16-36	2016	Homo sapiens	Serum	61	Female	TARAVAO	TAHITI	Alive	NA	L. interrogans	9	Lineage 4	This study
CHPF-16-37	2016	Homo sapiens	Serum	40	Male	TAIARAPU-EST	TAHITI	Alive	NA	L. interrogans	10	Lineage 4	This study
CHPF-16-38	2016	Homo sapiens	Serum	52	Male	PUNAAUIA	TAHITI	Alive	NA	L. interrogans	10	Lineage 4	This study
CHPF-16-41	2016	Homo sapiens	Serum	29	Male	PUNAAUIA	TAHITI	Alive	NA	L. interrogans	9	Lineage 4	This study
CHPF-16-42	2016	Homo sapiens	Serum	59	Male	TARAVAO	TAHITI	Alive	NA	L. interrogans	10	Lineage 4	This study
CHPF-16-43	2016	Homo sapiens	Serum	14	Female	MAHINA	TAHITI	Alive	NA	L. interrogans	7	Lineage 3	This study
CHPF-17-01	2017	Homo sapiens	Serum	37	Male	PUNAAUIA	TAHITI	Alive	NA	L. interrogans	9	Lineage 4	This study
CHPF-17-02	2017	Homo sapiens	Serum	14	Male	PUNAAUIA	TAHITI	Alive	NA	L. interrogans	10	Lineage 4	This study
CHPF-17-04	2017	Homo sapiens	Serum	25	Male	PAPEARI	TAHITI	Alive	NA	L. interrogans	9	Lineage 4	This study
CHPF-17-05	2017	Homo sapiens	Serum	30	Male	PAPARA	TAHITI	Alive	NA	L. interrogans	10	Lineage 4	This study
CHPF-17-06	2017	Homo sapiens	Serum	50	Female	TAIARAPU-EST	TAHITI	Alive	NA	L. interrogans	10	Lineage 4	This study
CHPF-17-07	2017	Homo sapiens	Serum	37	Male	PAPARA	TAHITI	Alive	NA	L. interrogans	10	Lineage 4	This study
CHPF-17-08	2017	Homo sapiens	Serum	14	Male	PAPEETE	TAHITI	Alive	NA	L. interrogans	10	Lineage 4	This study
CHPF-17-11	2017	Homo sapiens	Serum	44	Male	HITIAA O TE RA	TAHITI	Alive	NA	L. interrogans	10	Lineage 4	This study
CHPF-17-13	2017	Homo sapiens	Serum	13	Male	HITIAA O TE RA	TAHITI	Alive	NA	L. interrogans	10	Lineage 4	This study
CHPF-17-14	2017	Homo sapiens	Serum	34	Male	FAAA	TAHITI	Alive	NA	L. interrogans	9	Lineage 4	This study
CHPF-17-15	2017	Homo sapiens	Serum	23	Male	PAEA	TAHITI	Alive	NA	L. interrogans	9	Lineage 4	This study
CHPF-17-16	2017	Homo sapiens	Serum	43	Female	TAIARAPU-EST	TAHITI	Alive	NA	L. weilii	3	Lineage 2	This study
CHPF-17-19	2017	Homo sapiens	Serum	46	Male	FAAA	TAHITI	Alive	NA	L. interrogans	9	Lineage 4	This study
CHPF-17-21	2017	Homo sapiens	Serum	42	Male	PAPEETE	TAHITI	Dead	NA	L. interrogans	10	Lineage 4	This study
CHPF-17-23	2017	Homo sapiens	Serum	35	Male	PAPEETE	TAHITI	Alive	NA	L. interrogans	9	Lineage 4	This study
CHPF-17-25	2017	Homo sapiens	Serum	40	Male	PAPEETE	TAHITI	Alive	NA	L. interrogans	9	Lineage 4	This study
CHPF-17-26	2017	Homo sapiens	Serum	19	Male	FAAONE	TAHITI	Alive	NA	L. interrogans	9	Lineage 4	This study
CHPF-17-27	2017	Homo sapiens	Serum	56	Male	MAHINA	TAHITI	Alive	NA	L. interrogans	9	Lineage 4	This study
CHPF-17-28	2017	Homo sapiens	Serum	41	Male	PAPARA	TAHITI	Alive	NA	L. interrogans	9	Lineage 4	This study
CHPF-17-29	2017	Homo sapiens	Serum	70	Male	PAPARA	TAHITI	Alive	NA	L. interrogans	9	Lineage 4	This study
CHPF-17-30	2017	Homo sapiens	Serum	13	Male	HITIAA O TE RA	TAHITI	Alive	NA	L. interrogans	9	Lineage 4	This study
CHPF-17-31	2017	Homo sapiens	Serum	22	Male	PAPARA	TAHITI	Alive	NA	L. interrogans	10	Lineage 4	This study
CHPF-17-34	2017	Homo sapiens	Serum	44	Female	PAPARA	TAHITI	Alive	NA	L. interrogans	10	Lineage 4	This study
CHPF-17-36	2017	Homo sapiens	Serum	65	Male	FAAA	TAHITI	Alive	NA	L. interrogans	11	Lineage 4	This study
CHPF-17-37	2017	Homo sapiens	Serum	20	Male	TAIARAPU-OUEST	TAHITI	Alive	NA	L. interrogans	10	Lineage 4	This study
CHPF-17-38	2017	Homo sapiens	Serum	24	Male	PAPARA	TAHITI	Alive	NA	L. interrogans	8	Lineage 3	This study
CHPF-18-01	2018	Homo sapiens	Serum	33	Male	FAAA	TAHITI	Alive	NA	L. interrogans	9	Lineage 4	This study
CHPF-18-02	2018	Homo sapiens	Serum	46	Male	TAIARAPU-EST	TAHITI	Alive	NA	L. interrogans	9	Lineage 4	This study
CHPF-18-03	2018	Homo sapiens	Serum	32	Male	PIRAE	TAHITI	Alive	NA	L. interrogans	9	Lineage 4	This study
CHPF-18-04	2018	Homo sapiens	Serum	27	Male	TEVA I UTA	TAHITI	Alive	NA	L. interrogans	9	Lineage 4	This study
CHPF-18-05	2018	Homo sapiens	Serum	50	Male	PAPEETE	TAHITI	Alive	NA	L. interrogans	9	Lineage 4	This study
CHPF-18-06	2018	Homo sapiens	Serum	31	Male	FAAA	TAHITI	Alive	NA	L. interrogans	9	Lineage 4	This study
CHPF-18-07	2018	Homo sapiens	Serum	37	Male	PAPARA	TAHITI	Alive	NA	L. interrogans	9	Lineage 4	This study
CHPF-18-08	2018	Homo sapiens	Serum	62	Female	PAPENOO	TAHITI	Alive	NA	L. interrogans	9	Lineage 4	This study
CHPF-18-09	2018	Homo sapiens	Serum	25	Female	PAPEETE	TAHITI	Alive	NA	L. interrogans	9	Lineage 4	This study
CHPF-18-10	2018	Homo sapiens	Serum	41	Male	TAIARAPU-OUEST	TAHITI	Alive	NA	L. interrogans	9	Lineage 4	This study
CHPF-18-11	2018	Homo sapiens	Serum	23	Female	HITIAA O TE RA	TAHITI	Alive	NA	L. interrogans	10	Lineage 4	This study
CHPF-18-12	2018	Homo sapiens	Serum	30	Male	TAIARAPU-EST	TAHITI	Alive	NA	L. interrogans	9	Lineage 4	This study
CHPF-18-14	2018	Homo sapiens	Serum	48	Male	TEVA I UTA	TAHITI	Alive	NA	L. interrogans	9	Lineage 4	This study
CHPF-18-16	2018	Homo sapiens	Serum	34	Male	PAPEETE	TAHITI	Alive	NA	L. interrogans	9	Lineage 4	This study
CHPF-18-19	2018	Homo sapiens	Serum	28	Male	FAAA	TAHITI	Alive	NA	L. interrogans	9	Lineage 4	This study
CHPF-18-21	2018	Homo sapiens	Serum	30	Male	MAHINA	TAHITI	Alive	NA	L. interrogans	9	Lineage 4	This study
CHPF-18-22	2018	Homo sapiens	Serum	25	Male	FAAA	TAHITI	Alive	NA	L. interrogans	9	Lineage 4	This study
CHPF-18-25	2018	Homo sapiens	Serum	33	Male	TAIARAPU-OUEST	TAHITI	Alive	NA	L. interrogans	9	Lineage 4	This study
CHPF-18-26	2018	Homo sapiens	Serum	50	Male	PAPEETE	TAHITI	Alive	NA	L. interrogans	9	Lineage 4	This study
CHPF-18-27	2018	Homo sapiens	Serum	32	Male	FAAA	TAHITI	Alive	NA	L. interrogans	10	Lineage 4	This study
CHPF-18-28	2018	Homo sapiens	Serum	54	Male	PAPEARI	TAHITI	Dead	NA	L. interrogans	10	Lineage 4	This study
CHPF-18-29	2018	Homo sapiens	Serum	71	Male	FAAA	TAHITI	Alive	NA	L. interrogans	7	Lineage 3	This study
CHPF-18-30	2018	Homo sapiens	Serum	37	Male	PAPARA	TAHITI	Alive	NA	L. interrogans	9	Lineage 4	This study
CHPF-18-31	2018	Homo sapiens	Serum	32	Male	PAPARA	TAHITI	Alive	NA	L. interrogans	10	Lineage 4	This study
CHPF-18-32	2018	Homo sapiens	Serum	46	Male	FAAA	TAHITI	Alive	NA	L. interrogans	10	Lineage 4	This study
CHPF-18-33	2018	Homo sapiens	Serum	10	Male	FAAA	TAHITI	Alive	NA	L. interrogans	17	Lineage 4	This study
CHPF-18-35	2018	Homo sapiens	Serum	15	Male	MAHINA	TAHITI	Alive	NA	L. interrogans	9	Lineage 4	This study
CHPF-18-37	2018	Homo sapiens	Serum	28	Female	HITIAA O TE RA	TAHITI	Alive	NA	L. interrogans	9	Lineage 4	This study
CHPF-18-39	2018	Homo sapiens	Serum	45	Male	PAPARA	TAHITI	Alive	NA	L. interrogans	9	Lineage 4	This study
CHPF-18-40	2018	Homo sapiens	Serum	40	Male	MAHINA	TAHITI	Alive	NA	L. interrogans	10	Lineage 4	This study
CHPF-18-41	2018	Homo sapiens	Serum	28	Male	HITIAA O TE RA	TAHITI	Alive	NA	L. weilii	5	Lineage 2	This study
CHPF-18-42	2018	Homo sapiens	Serum	38	Male	PAPARA	TAHITI	Alive	NA	L. interrogans	10	Lineage 4	This study
CHPF-18-43	2018	Homo sapiens	Serum	32	Male	TAIARAPU-OUEST	TAHITI	Alive	NA	L. interrogans	10	Lineage 4	This study
CHPF-18-44	2018	Homo sapiens	Serum	21	Male	PAPARA	TAHITI	Alive	NA	L. interrogans	9	Lineage 4	This study
CHPF-18-46	2018	Homo sapiens	Serum	8	Male	HITIAA O TE RA	TAHITI	Alive	NA	L. interrogans	7	Lineage 3	This study
CHPF-18-49	2018	Homo sapiens	Serum	69	Male	PAPENOO	TAHITI	Dead	NA	L. interrogans	9	Lineage 4	This study
CHPF-18-50	2018	Homo sapiens	Serum	69	Male	PAPENOO	TAHITI	Dead	NA	L. interrogans	9	Lineage 4	This study
CHPF-18-51	2018	Homo sapiens	Serum	43	Male	PAPARA	TAHITI	Alive	NA	L. interrogans	8	Lineage 3	This study
CHPF-18-52	2018	Homo sapiens	Serum	31	Male	HITIAA O TE RA	TAHITI	Alive	NA	L. interrogans	10	Lineage 4	This study
CHPF-18-53	2018	Homo sapiens	Serum	25	Male	PUNAAUIA	TAHITI	Alive	NA	L. interrogans	9	Lineage 4	This study
CHPF-18-55	2018	Homo sapiens	Serum	47	Male	TAIARAPU-OUEST	TAHITI	Alive	NA	L. interrogans	10	Lineage 4	This study
CHPF-18-56	2018	Homo sapiens	Serum	47	Male	PAPEETE	TAHITI	Alive	NA	L. interrogans	9	Lineage 4	This study
CHPF-18-58	2018	Homo sapiens	Serum	52	Male	MAHINA	TAHITI	Alive	NA	L. interrogans	9	Lineage 4	This study
CHPF-18-59	2018	Homo sapiens	Serum	57	Male	PIRAE	TAHITI	Alive	NA	L. interrogans	9	Lineage 4	This study
CHPF-18-60	2018	Homo sapiens	Serum	28	Male	PAPARA	TAHITI	Alive	NA	L. weilii	3	Lineage 2	This study
CHPF-18-61	2018	Homo sapiens	Serum	57	Male	HITIAA O TE RA	TAHITI	Alive	NA	L. interrogans	10	Lineage 4	This study
CHPF-18-62	2018	Homo sapiens	Serum	34	Male	TAIARAPU-EST	TAHITI	Alive	NA	L. interrogans	10	Lineage 4	This study
CHPF-18-63	2018	Homo sapiens	Serum	39	Male	PAPARA	TAHITI	Alive	NA	L. interrogans	9	Lineage 4	This study
CHPF-18-66	2018	Homo sapiens	Serum	23	Female	MAHINA	TAHITI	Alive	NA	L. interrogans	10	Lineage 4	This study
CHPF-18-67	2018	Homo sapiens	Serum	69	Male	TEVA I UTA	TAHITI	Alive	NA	L. interrogans	10	Lineage 4	This study
CHPF-18-68	2018	Homo sapiens	Serum	66	Male	PAPARA	TAHITI	Alive	NA	L. interrogans	10	Lineage 4	This study
CHPF-18-69	2018	Homo sapiens	Serum	23	Female	HITIAA O TE RA	TAHITI	Alive	NA	L. interrogans	10	Lineage 4	This study
CHPF-18-70	2018	Homo sapiens	Serum	13	Male	PAPEETE	TAHITI	Alive	NA	L. interrogans	7	Lineage 3	This study
CHPF-18-73	2018	Homo sapiens	Serum	42	Male	PIRAE	TAHITI	Alive	NA	L. interrogans	9	Lineage 4	This study
CHPF-18-74	2018	Homo sapiens	Serum	32	Male	FAAA	TAHITI	Alive	NA	L. interrogans	9	Lineage 4	This study
CHPF-18-76	2018	Homo sapiens	Serum	20	Male	PAPEETE	TAHITI	Alive	NA	L. interrogans	7	Lineage 3	This study
CHPF-18-77	2018	Homo sapiens	Serum	70	Male	FAAA	TAHITI	Alive	NA	L. interrogans	10	Lineage 4	This study
CHPF-18-78	2018	Homo sapiens	Serum	19	Male	PAPEETE	TAHITI	Alive	NA	L. interrogans	9	Lineage 4	This study
CHPF-18-80	2018	Homo sapiens	Serum	57	Female	PAEA	TAHITI	Alive	NA	L. interrogans	14	Lineage 4	This study
CHPF-19-09	2019	Homo sapiens	Serum	42	Male	TAIARAPU-EST	TAHITI	Alive	NA	L. interrogans	10	Lineage 4	This study
CHPF-19-13	2019	Homo sapiens	Serum	8	Male	PAPEETE	TAHITI	Alive	NA	L. interrogans	10	Lineage 4	This study
CHPF-19-31	2019	Homo sapiens	Serum	36	Male	PUNAAUIA	TAHITI	Alive	NA	L. interrogans	9	Lineage 4	This study
CHPF-19-35	2019	Homo sapiens	Serum	63	Male	PIRAE	TAHITI	Alive	NA	L. weilii	4	Lineage 2	This study
CHPF-19-59	2019	Homo sapiens	Serum	70	Male	TARAVAO	TAHITI	Alive	NA	L. interrogans	7	Lineage 3	This study
CHPF-19-61	2019	Homo sapiens	Serum	27	Male	FAAA	TAHITI	Alive	NA	L. interrogans	9	Lineage 4	This study
CHPF-19-62	2019	Homo sapiens	Serum	30	Male	PAPARA	TAHITI	Alive	NA	L. interrogans	9	Lineage 4	This study
CHPF-19-63	2019	Homo sapiens	Serum	25	Female	FAAA	TAHITI	Alive	NA	L. interrogans	9	Lineage 4	This study
KY357055	2014	Homo sapiens	Serum	NA	NA	NA	TAHITI	NA	NA	L. interrogans	9	Lineage 4	Guernier et al., 2017
KY357057	2014	Homo sapiens	Serum	NA	NA	NA	TAHITI	NA	NA	L. interrogans	9	Lineage 4	Guernier et al., 2017
KY357058	2015	Homo sapiens	Serum	NA	NA	NA	TAHITI	NA	NA	L. interrogans	9	Lineage 4	Guernier et al., 2017
KY357060	2014	Homo sapiens	Serum	NA	NA	NA	TAHITI	NA	NA	L. interrogans	9	Lineage 4	Guernier et al., 2017
KY357063	2015	Homo sapiens	Serum	NA	NA	NA	TAHITI	NA	NA	L. interrogans	10	Lineage 4	Guernier et al., 2017
KY357064	2014	Canis familiaris	Serum	NA	NA	NA	TAHITI	NA	NA	L. interrogans	9	Lineage 4	Guernier et al., 2017
KY357066	2015	Homo sapiens	Serum	NA	NA	NA	TAHITI	NA	NA	L. interrogans	9	Lineage 4	Guernier et al., 2017
KY357070	2014	Canis familiaris	Serum	NA	NA	NA	TAHITI	NA	NA	L. interrogans	10	Lineage 4	Guernier et al., 2017
KY357071	2014	Homo sapiens	Serum	NA	NA	NA	TAHITI	NA	NA	L. interrogans	9	Lineage 4	Guernier et al., 2017
KY357072	2014	Homo sapiens	Serum	NA	NA	NA	TAHITI	NA	NA	L. interrogans	10	Lineage 4	Guernier et al., 2017
KY357074	2014	Homo sapiens	Serum	NA	NA	NA	TAHITI	NA	NA	L. borgpetersenii	2	Lineage 1	Guernier et al., 2017
KY357081	2012	Sus scrofa	Kidney	NA	NA	NA	TAHITI	NA	NA	L. interrogans	8	Lineage 3	Guernier et al., 2017
KY357082	2012	Sus scrofa	Kidney	NA	NA	NA	TAHITI	NA	NA	L. interrogans	8	Lineage 3	Guernier et al., 2017
KY357083	2012	Sus scrofa	Kidney	NA	NA	NA	TAHITI	NA	NA	L. interrogans	8	Lineage 3	Guernier et al., 2017
KY357084	2012	Sus scrofa	Kidney	NA	NA	NA	TAHITI	NA	NA	L. interrogans	8	Lineage 3	Guernier et al., 2017
KY357085	2012	Sus scrofa	Kidney	NA	NA	NA	TAHITI	NA	NA	L. interrogans	8	Lineage 3	Guernier et al., 2017
KY357086	2012	Sus scrofa	Kidney	NA	NA	NA	TAHITI	NA	NA	L. interrogans	8	Lineage 3	Guernier et al., 2017
KY357087	2012	Sus scrofa	Kidney	NA	NA	NA	TAHITI	NA	NA	L. interrogans	8	Lineage 3	Guernier et al., 2017
KY357088	2012	Sus scrofa	Kidney	NA	NA	NA	TAHITI	NA	NA	L. interrogans	8	Lineage 3	Guernier et al., 2017
KY357089	2012	Sus scrofa	Kidney	NA	NA	NA	TAHITI	NA	NA	L. interrogans	8	Lineage 3	Guernier et al., 2017
KY357090	2012	Sus scrofa	Kidney	NA	NA	NA	TAHITI	NA	NA	L. interrogans	8	Lineage 3	Guernier et al., 2017
KY357091	2012	Sus scrofa	Kidney	NA	NA	NA	TAHITI	NA	NA	L. interrogans	8	Lineage 3	Guernier et al., 2017
KY357092	2012	Sus scrofa	Kidney	NA	NA	NA	TAHITI	NA	NA	L. interrogans	8	Lineage 3	Guernier et al., 2017
KY357093	2012	Sus scrofa	Kidney	NA	NA	NA	TAHITI	NA	NA	L. interrogans	8	Lineage 3	Guernier et al., 2017
KY357094	2012	Sus scrofa	Kidney	NA	NA	NA	TAHITI	NA	NA	L. interrogans	8	Lineage 3	Guernier et al., 2017
KY357095	2012	Sus scrofa	Kidney	NA	NA	NA	TAHITI	NA	NA	L. interrogans	8	Lineage 3	Guernier et al., 2017
KY357096	2012	Sus scrofa	Kidney	NA	NA	NA	TAHITI	NA	NA	L. interrogans	8	Lineage 3	Guernier et al., 2017
KY357097	2012	Sus scrofa	Kidney	NA	NA	NA	TAHITI	NA	NA	L. interrogans	8	Lineage 3	Guernier et al., 2017
KY357098	2012	Sus scrofa	Kidney	NA	NA	NA	TAHITI	NA	NA	L. interrogans	8	Lineage 3	Guernier et al., 2017
KY357099	2012	Sus scrofa	Kidney	NA	NA	NA	TAHITI	NA	NA	L. interrogans	8	Lineage 3	Guernier et al., 2017
KY357100	2012	Sus scrofa	Kidney	NA	NA	NA	TAHITI	NA	NA	L. interrogans	9	Lineage 4	Guernier et al., 2017
KY357101	2012	Sus scrofa	Kidney	NA	NA	NA	TAHITI	NA	NA	L. interrogans	8	Lineage 3	Guernier et al., 2017
KY357102	2012	Sus scrofa	Kidney	NA	NA	NA	TAHITI	NA	NA	L. interrogans	8	Lineage 3	Guernier et al., 2017
KY357103	2012	Sus scrofa	Kidney	NA	NA	NA	TAHITI	NA	NA	L. interrogans	8	Lineage 3	Guernier et al., 2017
KY357104	2012	Sus scrofa	Kidney	NA	NA	NA	TAHITI	NA	NA	L. interrogans	8	Lineage 3	Guernier et al., 2017
KY357105	2012	Sus scrofa	Kidney	NA	NA	NA	TAHITI	NA	NA	L. interrogans	8	Lineage 3	Guernier et al., 2017
KY357106	2012	Sus scrofa	Kidney	NA	NA	NA	TAHITI	NA	NA	L. interrogans	8	Lineage 3	Guernier et al., 2017
KY357107	2012	Sus scrofa	Kidney	NA	NA	NA	TAHITI	NA	NA	L. interrogans	8	Lineage 3	Guernier et al., 2017
KY357108	2012	Sus scrofa	Kidney	NA	NA	NA	TAHITI	NA	NA	L. interrogans	8	Lineage 3	Guernier et al., 2017
KY357109	2012	Sus scrofa	Kidney	NA	NA	NA	TAHITI	NA	NA	L. interrogans	8	Lineage 3	Guernier et al., 2017
KY357114	2014	Homo sapiens	Serum	NA	NA	NA	TAHITI	NA	NA	L. interrogans	10	Lineage 4	Guernier et al., 2017
KY357117	2015	Rattus norvegicus	Kidney	NA	NA	NA	TAHITI	NA	NA	L. interrogans	9	Lineage 4	Guernier et al., 2017
KY357118	2015	Rattus norvegicus	Kidney	NA	NA	NA	TAHITI	NA	NA	L. interrogans	9	Lineage 4	Guernier et al., 2017
KY357119	2015	Rattus norvegicus	Kidney	NA	NA	NA	TAHITI	NA	NA	L. interrogans	9	Lineage 4	Guernier et al., 2017
KY357120	2015	Rattus norvegicus	Kidney	NA	NA	NA	TAHITI	NA	NA	L. interrogans	9	Lineage 4	Guernier et al., 2017
KY357121	2015	Rattus rattus	Kidney	NA	NA	NA	TAHITI	NA	NA	L. interrogans	9	Lineage 4	Guernier et al., 2017
KY357122	2015	Rattus norvegicus	Kidney	NA	NA	NA	TAHITI	NA	NA	L. borgpetersenii	2	Lineage 1	Guernier et al., 2017
KY357123	2015	Rattus norvegicus	Kidney	NA	NA	NA	TAHITI	NA	NA	L. borgpetersenii	1	Lineage 1	Guernier et al., 2017
KY357124	2015	Rattus norvegicus	Kidney	NA	NA	NA	TAHITI	NA	NA	L. interrogans	9	Lineage 4	Guernier et al., 2017
KY357125	2015	Rattus norvegicus	Kidney	NA	NA	NA	TAHITI	NA	NA	L. interrogans	9	Lineage 4	Guernier et al., 2017
KY357126	2015	Rattus norvegicus	Kidney	NA	NA	NA	TAHITI	NA	NA	L. borgpetersenii	2	Lineage 1	Guernier et al., 2017
KY357127	2015	Rattus rattus	Kidney	NA	NA	NA	TAHITI	NA	NA	L. interrogans	9	Lineage 4	Guernier et al., 2017
KY357128	2015	Rattus norvegicus	Kidney	NA	NA	NA	TAHITI	NA	NA	L. borgpetersenii	2	Lineage 1	Guernier et al., 2017
KY357129	2015	Rattus exulans	Kidney	NA	NA	NA	TAHITI	NA	NA	L. borgpetersenii	2	Lineage 1	Guernier et al., 2017
KY357130	2015	Rattus norvegicus	Kidney	NA	NA	NA	TAHITI	NA	NA	L. interrogans	9	Lineage 4	Guernier et al., 2017
KY357131	2015	Rattus norvegicus	Kidney	NA	NA	NA	TAHITI	NA	NA	L. interrogans	9	Lineage 4	Guernier et al., 2017
NA - not available
* reinfection; initial infection = CHPF-14-35
** reinfection; initial infection = CHPF-18-76
*** whole genome sequencing
